# Supplementary material for: Regulating the morphology and size of homopolypeptide self-assembliesviaselective solvents
Source: Royal Society of Chemistry journal article supplement (doi:10.1039/d1sm00679g), 2021-01-01
Supplement: d1sm00679g1.pdf [file d1sm00679g1.pdf]

## Electronic Supplementary Information (ESI)

### Regulating Morphology and Size of Homopolypeptide Self-assembles Via Selective Solvents

Wenchao Shu,<sup>a</sup> Zhen Liu,<sup>a</sup> Yangchun Xie,<sup>a</sup> Xinjie Shi,<sup>a</sup> Shuo Qi,<sup>a</sup> Min Xiu,<sup>\*b</sup> and Xiaohua He,<sup>\*a</sup> <sup>a</sup>School of Chemistry and Molecular Engineering, East China Normal University, No.500 Dongchuan Road, Shanghai 200241, China

<sup>b</sup> School of Physics and Electronic Science, Shanghai Key Laboratory of Magnetic Resonance, East China Normal University, No.500 Dongchuan Road, Shanghai 200241, China

#### 1. The synthesis route of Py-PBLG<sub>n</sub>

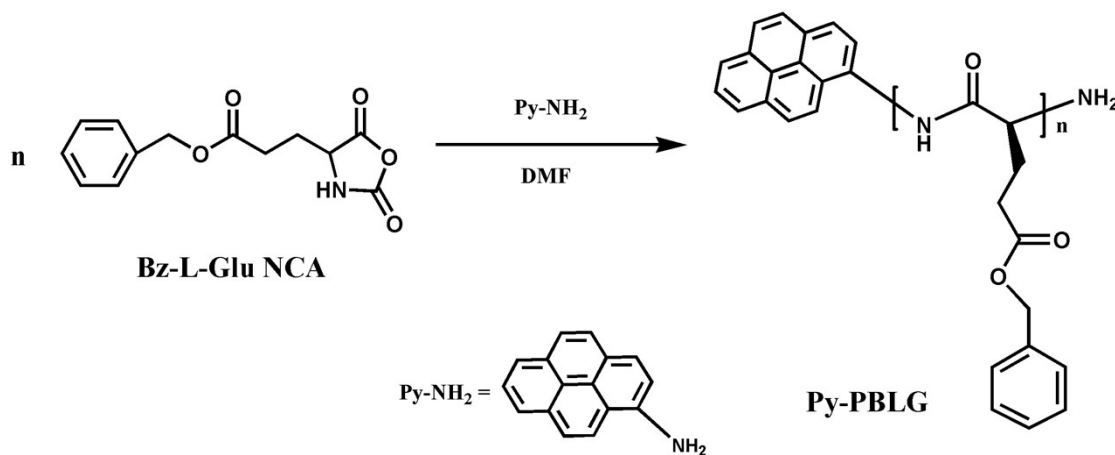

**Scheme S1.** Synthesis route of Py-PBLG<sub>n</sub> (n=100 and 40)

## 2. Results and Analysis

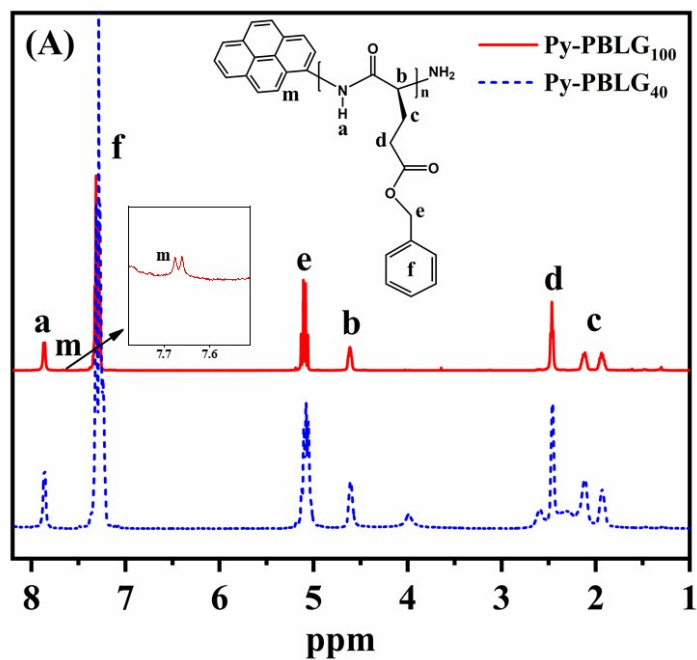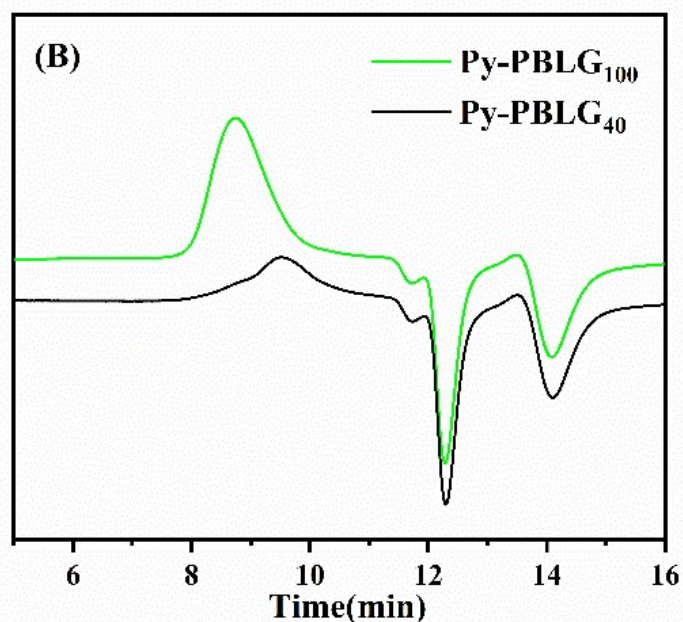

**Figure S1.**  $^1\text{H}$  NMR spectra (A) and GPC curves (B) of Py-PBLG<sub>n</sub> ( $n=100$  and  $40$ ).

Fig. S1(A) shows  $^1\text{H}$  NMR spectra of Py-PBLG<sub>n</sub> ( $n=100$  and  $40$ ) in  $\text{CDCl}_3$  with 15% TFA. The resonance signals of the protons of amide group (Fig. S1A: a), pyrene group (Fig. S1A: m),

phenyl group (Fig. S1A: f), methylene group of benzyl (Fig. S1A: e),  $\alpha$ -methine group (Fig. S1A: b), and  $\beta$ - and  $\gamma$ -methylene groups (Fig. S1A: c and d) appear at 7.88, 7.67, 7.33, 5.08, 4.61 and 2.15-1.93 ppm, respectively. The DP value of Py-PBLG can be obtained by integral ratio of protons from the pyrene group at 7.67 ppm (Fig. S1A: m) to the methylene groups of benzyl at 5.08 ppm (Fig. S1A: e) or the  $\alpha$ -methine groups at 4.61 ppm (Fig. S1A: b), which are consistent within the experimental error of  $^1\text{H}$  NMR measurement. By controlling the molar ratio of the initiator Py-NH<sub>2</sub> to monomer BLG-NCA, two samples with different DP values (n=100 and 40) (see Table S1) can be prepared.

The GPC curves of Py-PBLG<sub>n</sub> (n=100 and 40) are unimodal and symmetrical, clearly shifting toward the higher molecular weight region with increasing the DP of Py-PBLG, as shown in Fig. S1: B. The obtained results are listed in Table S1 and the molecular weight distributions (Mw/Mn) are narrow (~1.30)

**Table S1.** characteristics of homopolypeptides

| Sample                 | <sup>a)</sup> $M_n$ (g/mol) | <sup>a)</sup> DP | <sup>b)</sup> PDI |
|------------------------|-----------------------------|------------------|-------------------|
| Py-PBLG <sub>100</sub> | 21 000                      | 100              | 1.10              |
| Py-PBLG <sub>40</sub>  | 9 000                       | 40               | 1.30              |

a. Determined by GPC.

b. Determined by  $^1\text{H}$  NMR.

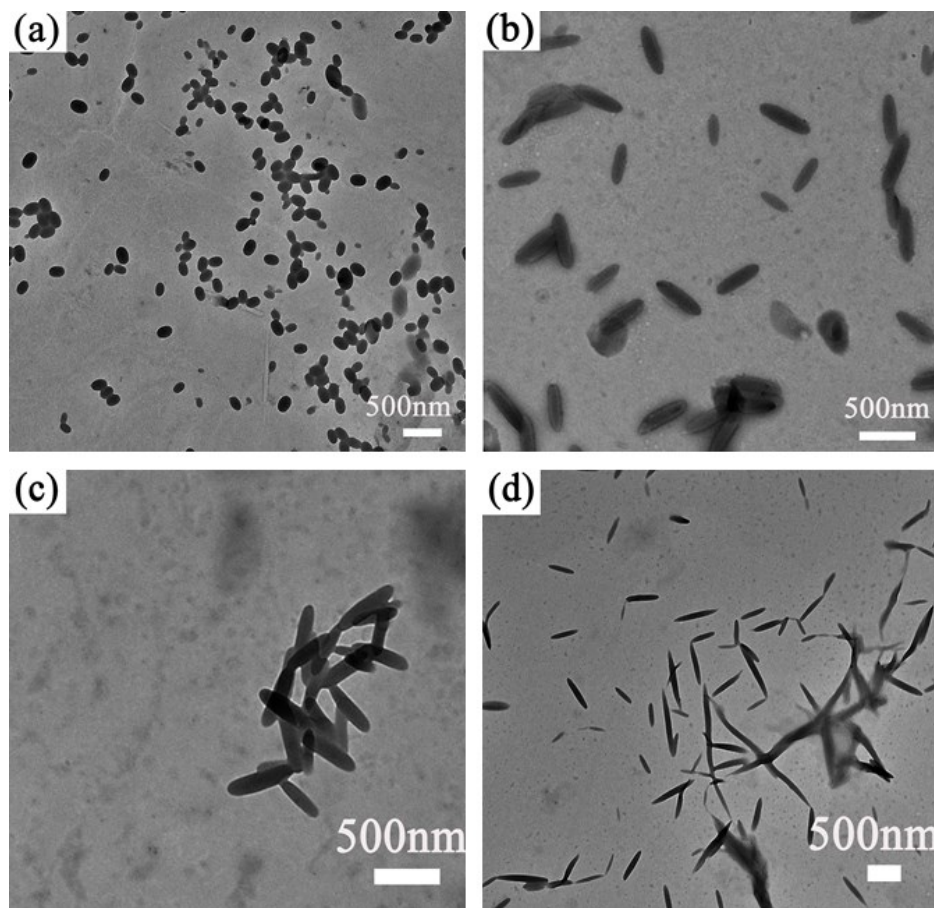

**Figure S2.** TEM images of the aggregate self-assembled from Py-PBLG<sub>100</sub> with various volume fraction of methanol: (a) 0, (b) 50%, (c) 75%, (d) 87%.

Figure S2 shows TEM images of the aggregates self-assembled from Py-PBLG<sub>100</sub>. It is obvious that the length of the spindle-like micelles increases with the increase of the methanol content in the selective cosolvents.

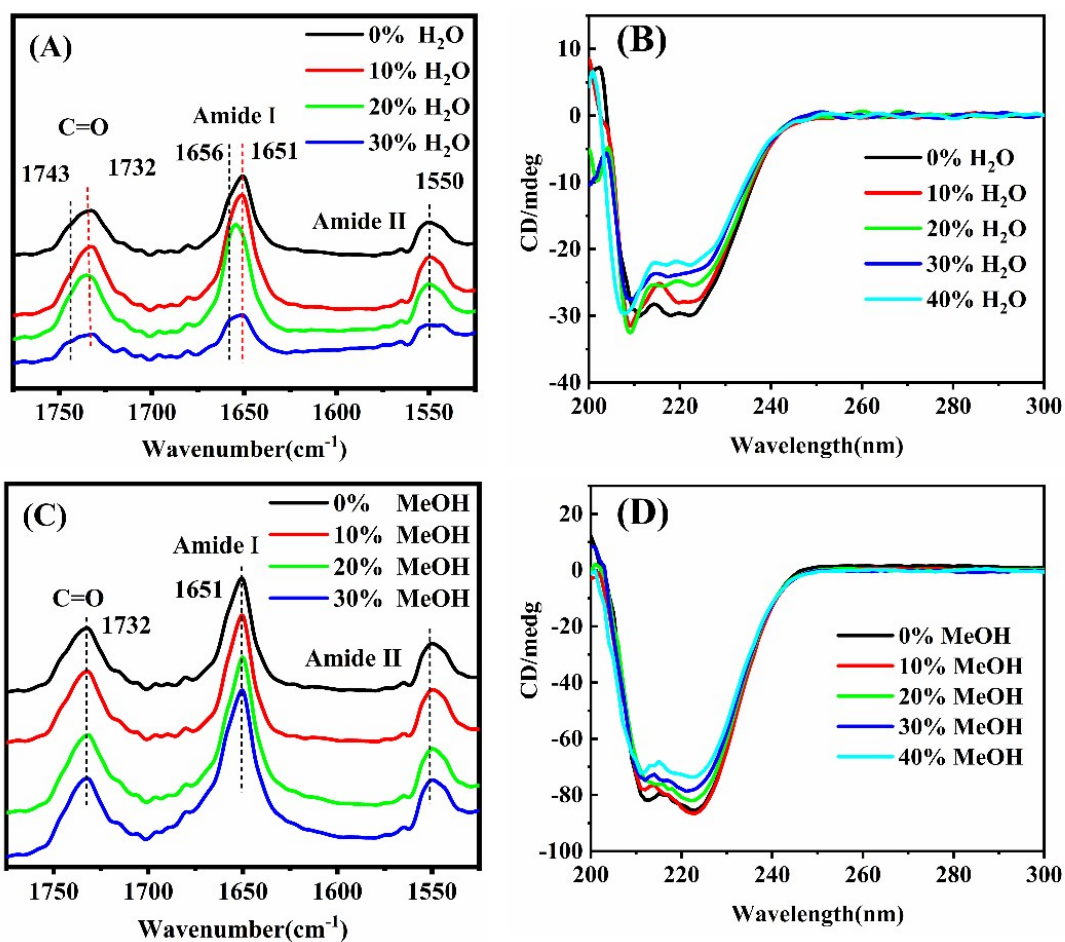

**Figure S3.** FT-IR spectra of Py-PBLG<sub>40</sub> in THF (2.0 mg/mL) with the different amount of D<sub>2</sub>O (A) and methanol (C), respectively. CD spectra of the Py-PBLG<sub>40</sub> in THF (0.5 mg/mL) with the different amount of H<sub>2</sub>O (B) and methanol (D), respectively

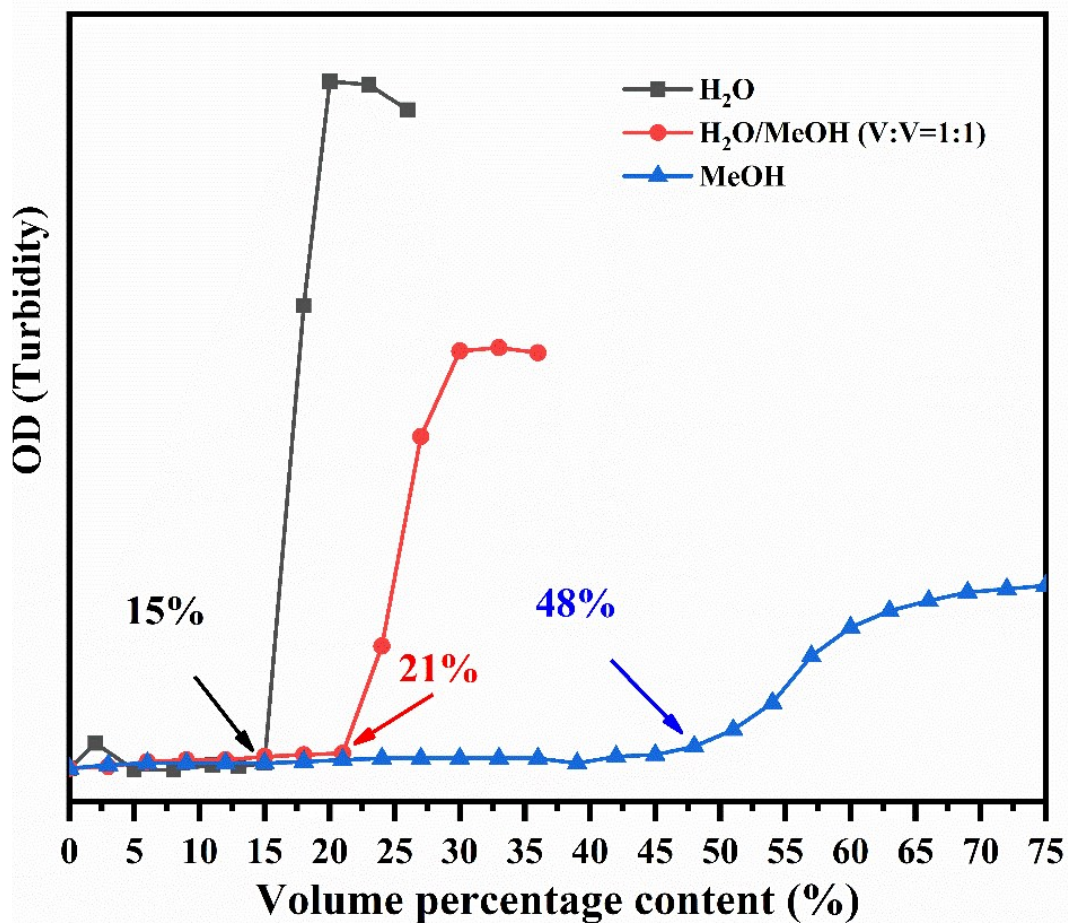

**Figure S4.** Turbidity (optical density) curves of Py-PBLG<sub>100</sub> with the amount of the addition selective solvents.

UV-Vis spectroscopy was used to monitor the variation of the turbidity of the solution during the self-assembly. The turbidity increases rapidly when the water content is ~15%, indicating the onset of self-assembly and that the critical water content (CWC) is around 15%. According to the same condition, the values of the critical H<sub>2</sub>O/MeOH content and the critical methanol content were obtained as ~21% and ~48%, respectively, by changing the selective solvents.
